# Supplementary material for: A novel photochromic coordination polymer based on a robust viologen ligand exhibiting multiple detection properties in the solid state
Source: Royal Society of Chemistry journal article supplement (doi:10.1039/c9dt03835c), 2019-01-01
Supplement: c9dt03835c1.pdf [file c9dt03835c1.pdf]

## A novel photochromic coordination polymer based on a robust viologen ligand exhibiting multiple detection properties in solid state

Hai yu Wang<sup>a</sup>, Zu ming Tu<sup>b</sup>, and Hong Zhang<sup>a, \*</sup>

*a. Institute of Polyoxometalate Chemistry, Department of Chemistry,*

*Northeast Normal University, Changchun, Jilin 130024, PR China.*

*mail: [hope20130122@163.com](mailto:hope20130122@163.com); [zhangh@nenu.edu.cn](mailto:zhangh@nenu.edu.cn).*

*b. Department of Chemistry, Wuhan Institute of Technology.*

*Wuhan 430000, PR China.*

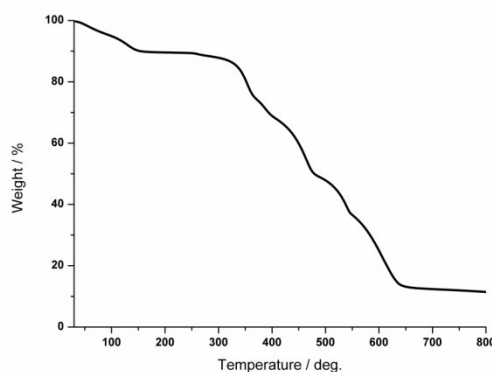

**Fig. S1** The TGA date of the complex **Cd- bcbpy**.

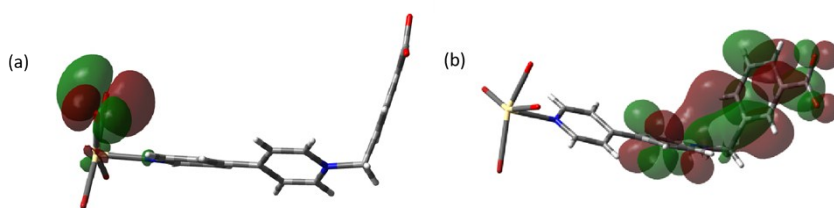

**Fig. S2** Calculated highest and lowest occupied molecule orbital HOMO (a) and LUMO (b) of **Cd- bcbpy**.

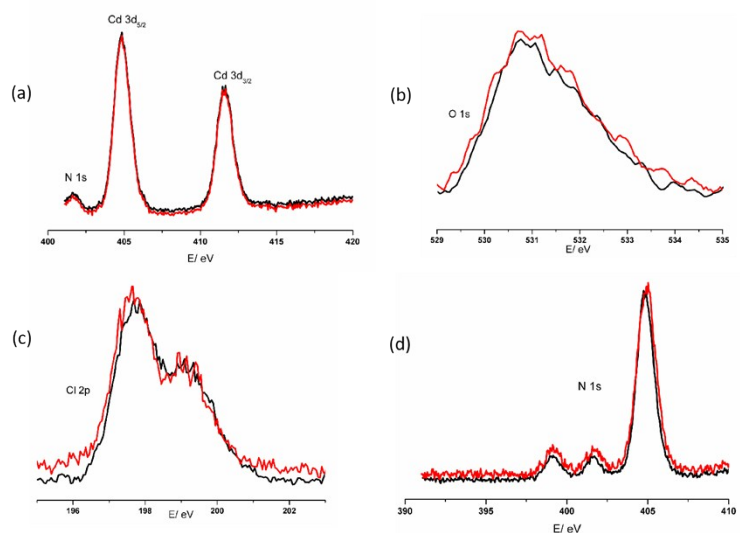

**Fig. 3** XPS spectra of Cd- bcbpy before(black) and after (red)irradiation.

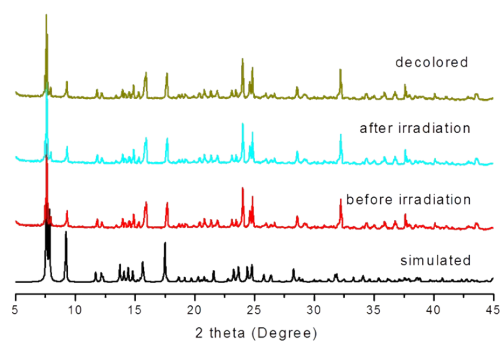

**Fig. S4** PXRD patterns of Cd- bcbpy before irradiation (red), after irradiation (sky blue), heat (red), decolored in dark(dark yellow). The black line is simulated curve.

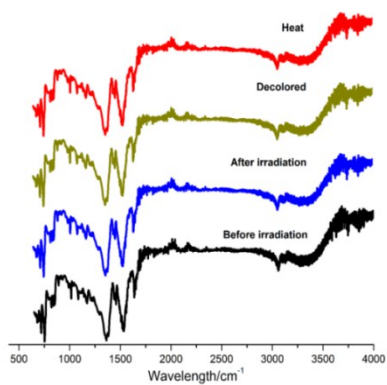

**Fig. S5** FTIR spectra of Cd- bcbpy before irradiation (black), after irradiation (blue), decolored (dark yellow) and heat at 100 °C for 2 hours(red).

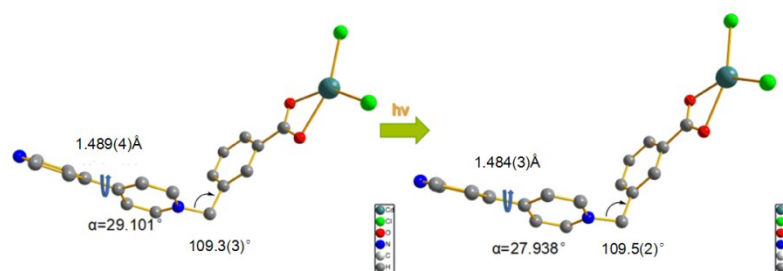

**Fig. S6** Coordination environment around the Cd(II) ion in **Cd- bcbpy** (left) and in photoirradiated sample **1P** (right).

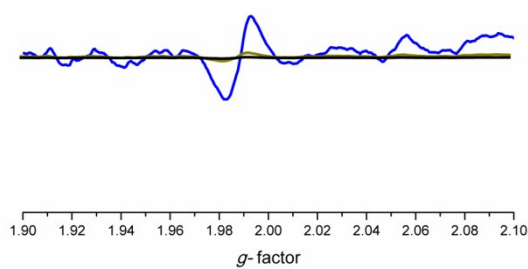

**Fig. S7** EPR spectral changes of CP@NH<sub>3</sub> (blue) and CP@Aniline (dark yellow).

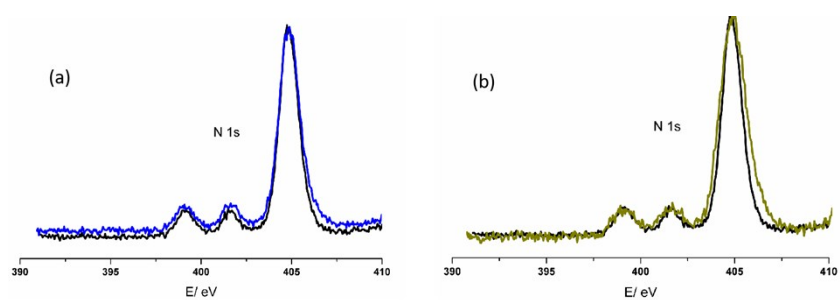

**Fig. S8** XPS spectra of **Cd- bcbpy** @NH<sub>3</sub>(a) and aniline (b)irradiation. The black line is the XPS spectrum of original sample.

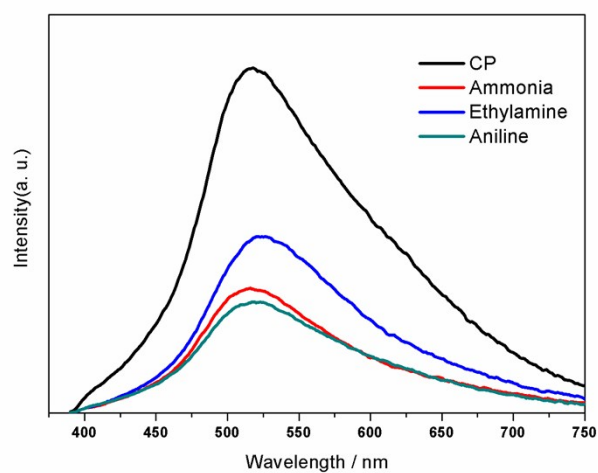

**Fig. S9** The luminescence emission spectral changes ( $\lambda_{\text{ex}} = 380 \text{ nm}$ ), when **Cd- bcbpy** detected different organic amines in solid state.

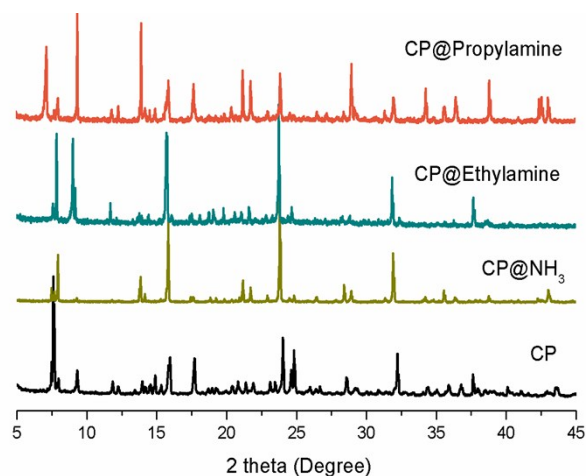

**Fig. S10** PXRD patterns of MOF@ different organic amines. The black line is simulated curve.

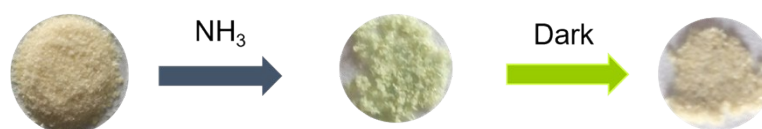

**Fig. S11** Photographs of CP, CP@  $\text{NH}_3$  and CP @  $\text{NH}_3$  in dark for 30 min.

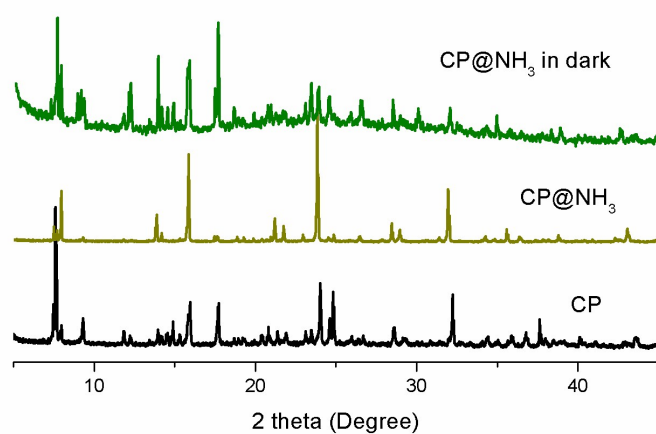

**Fig. S12** PXR D patterns of CP@ NH<sub>3</sub> and CP@ NH<sub>3</sub> in dark for 30 min. The black line is simulated curve.

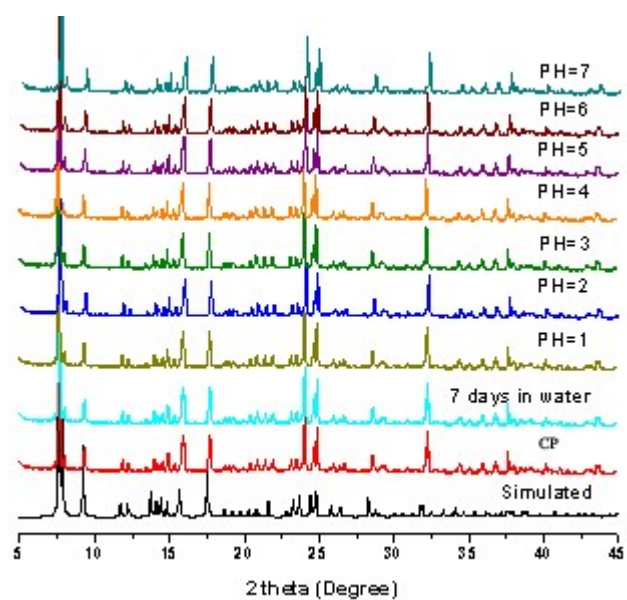

**Fig. S13** PXR D profiles for simulated and Cd- bcbpy samples soaked in boiling water and aqueous solutions with pH values from 1 to 7.

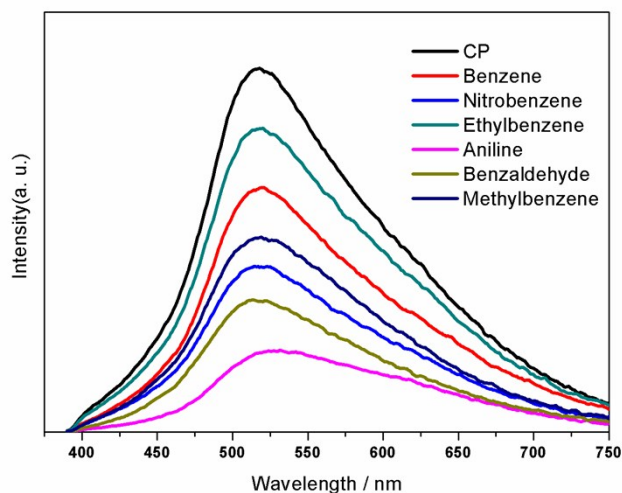

**Fig. S14** The luminescence emission spectral changes ( $\lambda_{\text{ex}} = 380 \text{ nm}$ ), when **Cd- bcbpy** detected different benzenes in solid state.

**Table S1** Selected Bond Lengths ( $\text{\AA}$ ) and Bond Angles ( $^\circ$ ) of **Cd- bcbpy** and **1P**.

| <b>Cd- bcbpy</b> |                        | <b>1P</b>   |                        |
|------------------|------------------------|-------------|------------------------|
| Bonds            | Dist. ( $\text{\AA}$ ) | Bonds       | Dist. ( $\text{\AA}$ ) |
| Cd1-Cl1          | 2.6016(7)              | Cd1-Cl1     | 2.5972(6)              |
| Cd1-Cl2          | 2.4964(7)              | Cd1-Cl2     | 2.4919(7)              |
| Cd1-O1           | 2.3730(19)             | Cd1-O1      | 2.3629(17)             |
| Cd1-O2           | 2.3855(18)             | Cd1-O2      | 2.3838(16)             |
| Cd1-N2           | 2.396(2)               | Cd1-N2      | 2.3998(19)             |
| Angle            | ( $^\circ$ )           | Angle       | ( $^\circ$ )           |
| Cl2-Cd1-Cl1      | 111.07(3)              | Cl2-Cd1-Cl1 | 111.03(2)              |
| O1-Cd1-Cl1       | 148.30(5)              | O1-Cd1-Cl1  | 147.94(4)              |
| O1-Cd1-Cl2       | 100.48(5)              | O1-Cd1-Cl2  | 100.85(5)              |
| O1-Cd1-O2        | 55.04(6)               | O1-Cd1-O2   | 55.09(6)               |
